# Supplementary material for: A phylogenomic analysis of the role and timing of molecular adaptation in the aquatic transition of cetartiodactyl mammals
Source: PubMed Central journal article supplement (PMC4593674; doi:10.1098/rsos.150156), 2015-09-30
Supplement: rsos150156supp1.pdf [file rsos150156supp1.pdf]

## DATA SUPPLEMENT

### A phylogenomic analysis of the role and timing of molecular adaptation in the aquatic transition of cetartiodactyl mammals.

Georgia Tsagkogeorga, Michael R. McGowen, Kalina T.J. Davies, Simon Jarman, Andrea Polanowski, Mads F. Bertelsen and Stephen J. Rossiter

#### CONTENTS:

**Figure S1.** Protein-protein interaction networks for 107 protein-coding gene products tested in both cetaceans and the hippo that were found to be under positive selection in the cetaceans. Inset: protein-protein interaction networks for 20 protein-coding genes found to be under positive selection in the hippo. Nodes are labelled with the standard protein names, and the thickness of each connection is scaled to represent the strength of support, with thicker lines representing higher support. Part A highlights proteins involved in the cell cycle and aging (grey); part B highlights proteins involved in lipids (red); Part C in hypoxia and DNA repair (red); parts D-F proteins related to fluid, kidneys, lungs or sensory perception (red) respectively.

**Supplementary material.** Contains information concerning taxon sampling, sequencing and RNA-Seq *de novo* assembly, as well as ortholog identification and data set assembly. It also provides additional information for natural selection analyses, GC content estimation, Gene Ontology (GO) enrichment analysis and, finally, network analysis of protein-protein interactions.

**Table S1.** RNA extraction QC, RNA-Seq and assembly statistics.

**Table S2.** Ortholog identification.

**Table S3.** Genome-wide analysis for bursts of divergent selection

**Table S4.** Pearson correlation test between MA model fit (LRT *p-values*) and  $\Delta GC3$  at the third codon position of the branch.

**Table S5-S6.** Separate .xls file with complete lists of genes with PSSs in hippos and whales under branch-site codon and clade models.

**Table S7.** GO terms enriched for positively selected genes in cetaceans, hippo and/or in both.

**Table S8.** Separate .xls file with results of GO enrichment analysis for the five branches tested for selection for the three GO domains: A. Biological Process; B. Cellular Component; C. Molecular Function.

Figure S1

A

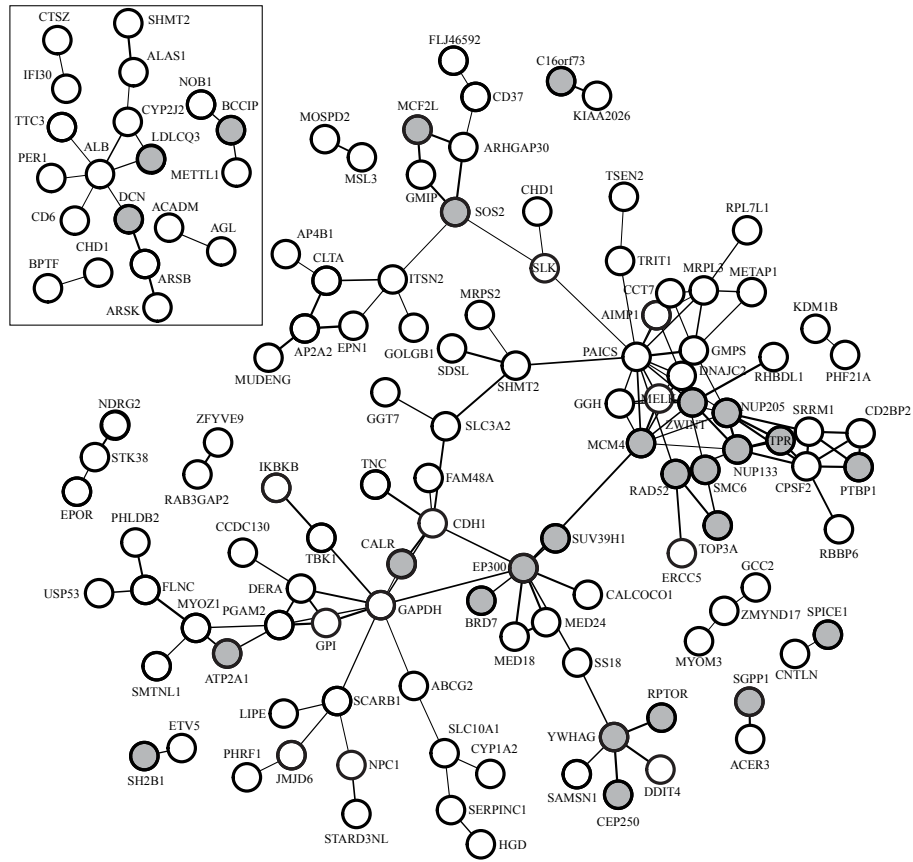

B

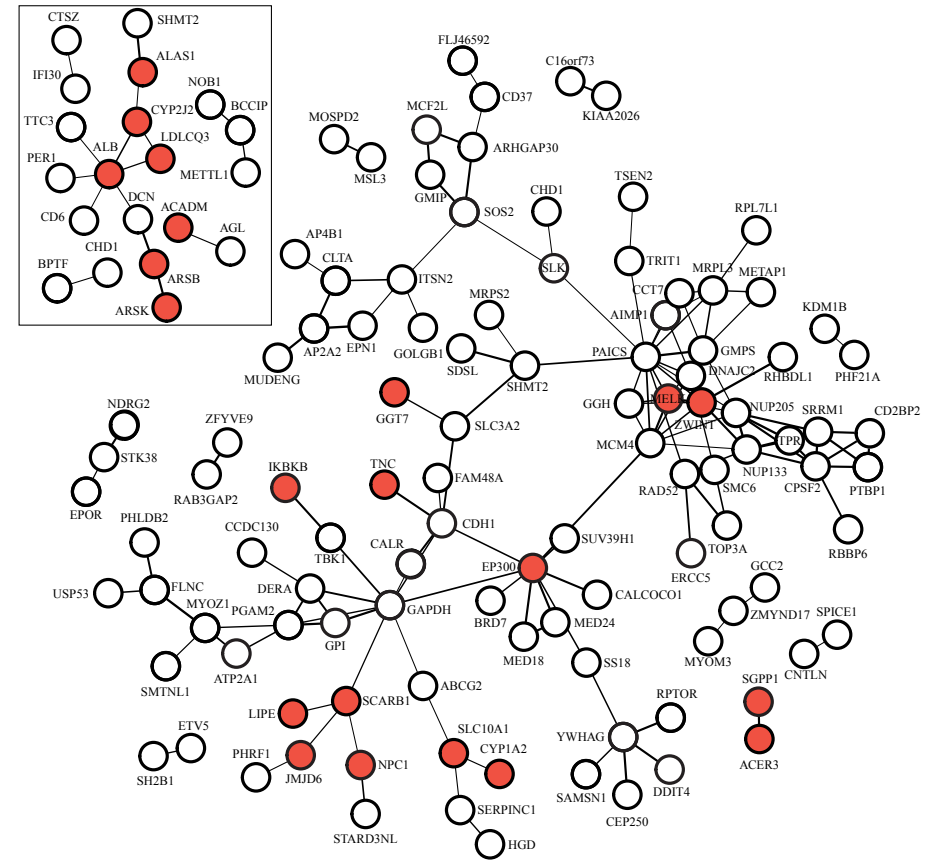

C

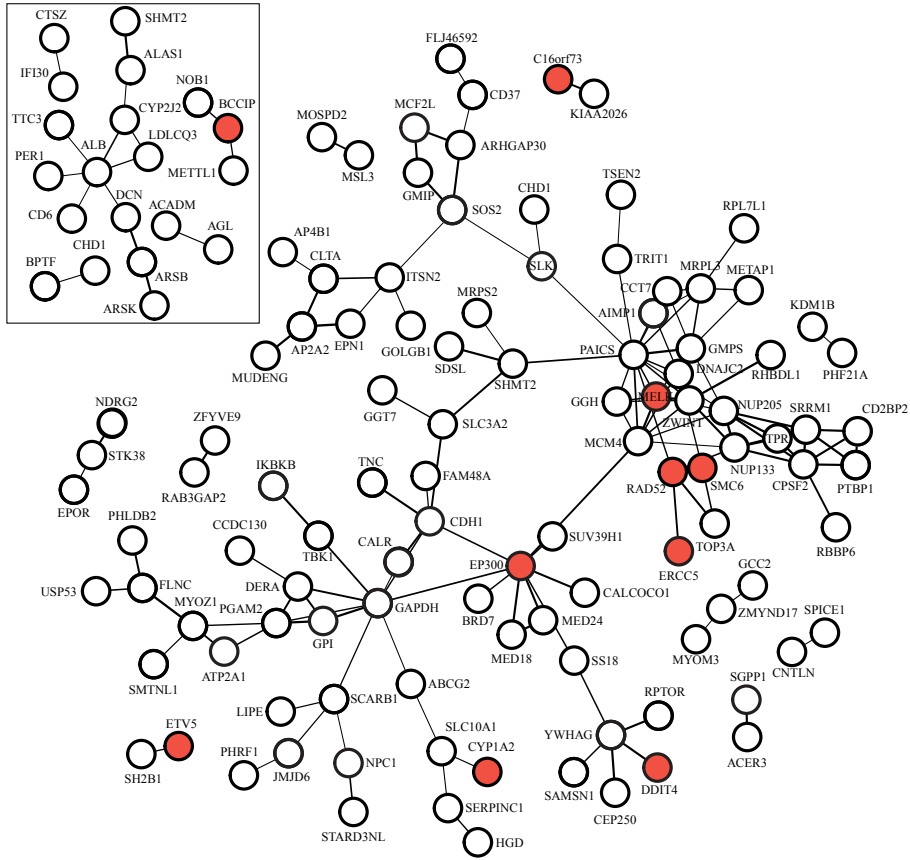

D

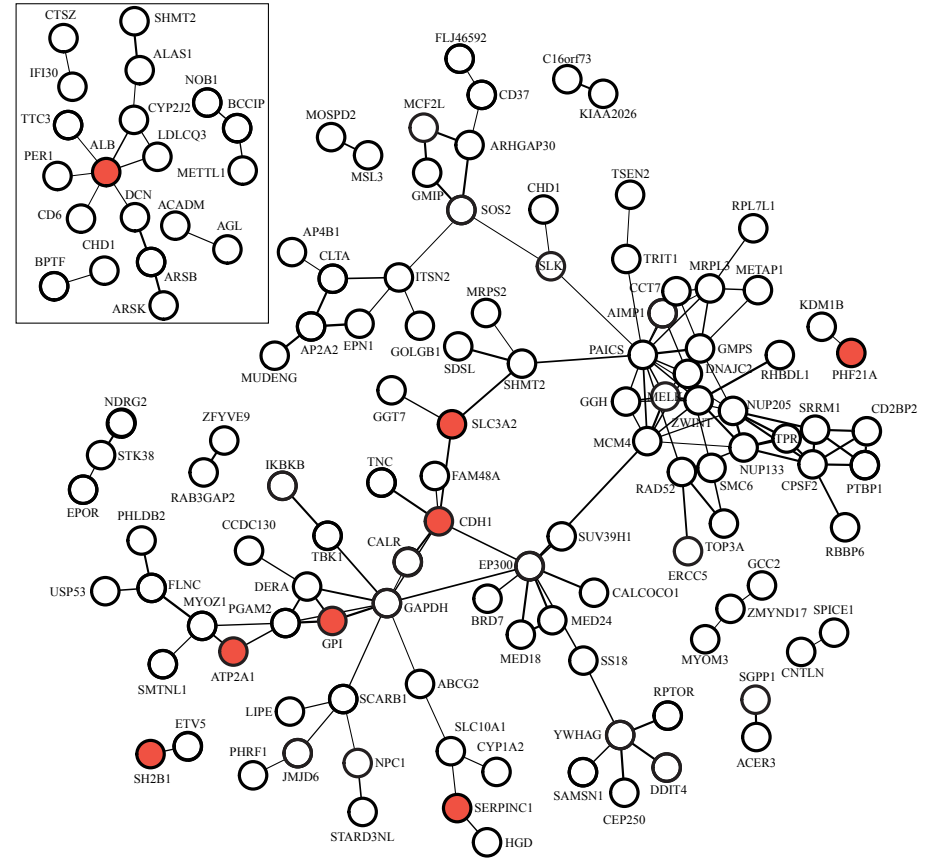

**E**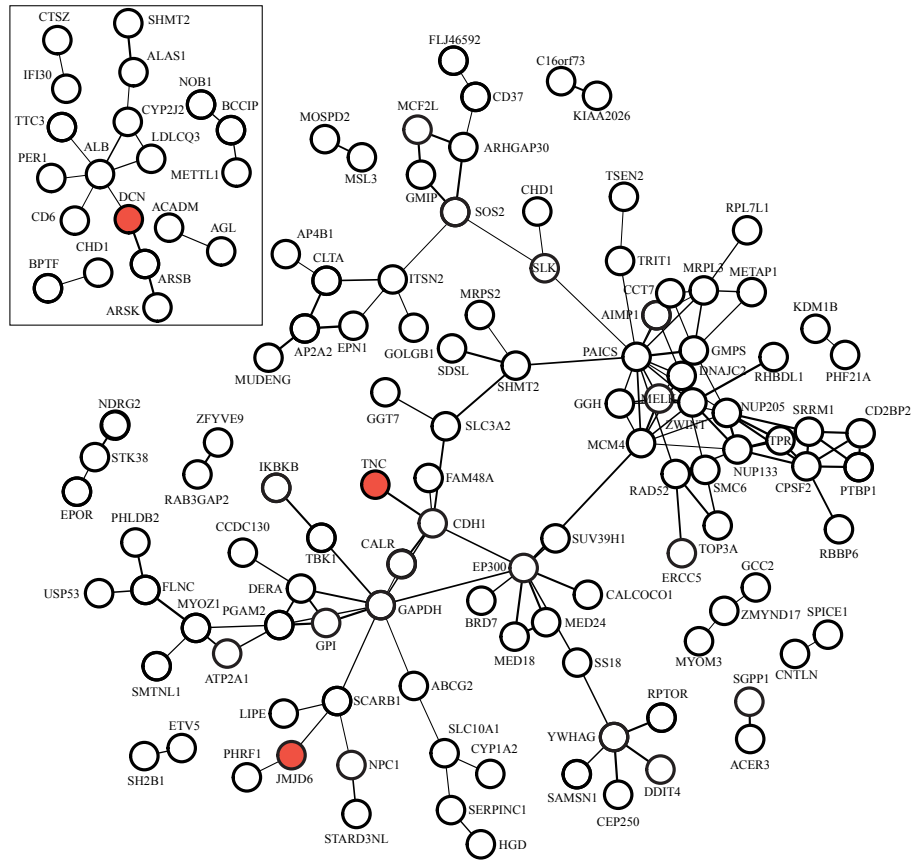**F**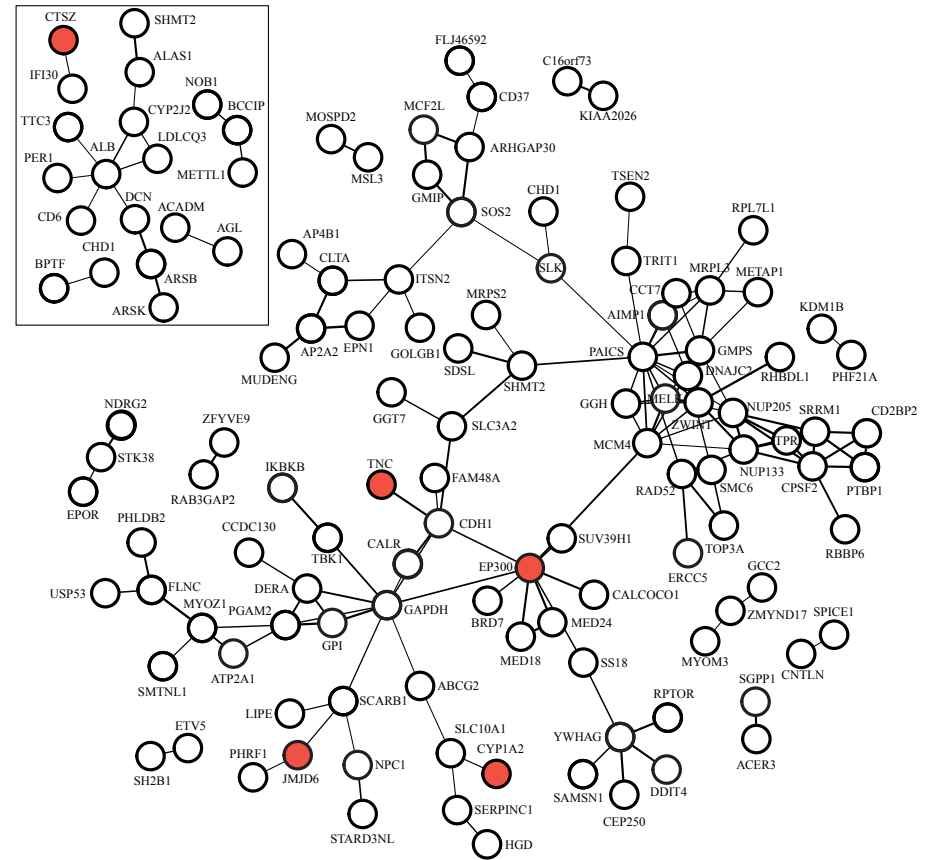



## Supplementary material

**Taxon sampling, sequencing and RNA-Seq *de novo* assembly.** We obtained new RNA-Seq data from the common hippo *H. amphibius* as well as from the humpback whale *M. novaeangliae*. For the hippo, we used a pool of tissue types (muscle, skin, heart, liver, spleen, kidney, lung and neural tissue) obtained from an adult female euthanized at Copenhagen Zoo. For the humpback whale, we pooled skin biopsies from three adult males. RNA was isolated at BGI (hippo) and the Australian Marine Mammal Centre (whale). cDNA library construction followed by pair-end Illumina HiSeq sequencing was performed at BGI (see Additional file 2). CDS data from three additional cetacean species, the minke whale *B. acutorostrata*, the fin whale *B. physalus*, and the finless porpoise *Neophocaena phocaenoides* were from Yim et al (2014). RNA-Seq sequences for the sperm whale *Physeter macrocephalus* and the Indo-Pacific humpback dolphin *Sousa chinensis*, were downloaded from the SRA (Short Read Archive) of GenBank (Acc. Nos. SRX220350-SRX220358 and ERX283216, respectively). Similar to the Illumina data from the humpback whale and hippo, all RNA-Seq data were assembled into transcripts *de novo* using the program Trinity (trinityrnaseq-r2013-02-25) under the default parameters [1]. For the bottlenose dolphin *T. truncatus* and the killer whale *Orcinus orca*, assembled and annotated RNA transcripts were previously available and downloaded directly from the Ensembl database (release 70) and Genbank, respectively. In the case of the river dolphin *Lipotes vexillifer*, there were no transcriptome data available at the time, so we used the software MAKER2 [2] to perform a *de novo* gene annotation on its genome available in Genbank.

**Ortholog identification and data set assembly.** To build clusters of orthologous CDSs across all sampled cetaceans and the hippo, we performed a series of reciprocal similarity searches using blastx and tblastn. We used the bottlenose dolphin and human genomes as a reference and blasted the longest protein product of each locus (~16,500 sequences in the dolphin and ~23,600 in the human genomes) against our assembled sequences for each species. Hits in the targeted sequence pool were next blasted back to the initial *T. truncatus* and *H. sapiens* proteins, and only reciprocal matches were retained as putatively orthologous sequences. Based on orthologs that we successfully identified in at least one Mysticeti and one Odontoceti species, we next populated our gene sets with single copy orthologous (one-to-one) coding sequences of other (laurasiatherian) mammals using a custom perl script in Ensembl API [3]. The number of candidate one-to-one orthologs across eight cetancodontan species ranged from 6,249 to 16,047 genes (see Additional file 2). More orthologs were obtained in human-anchored similarity searches, despite the fact that the bottlenose dolphin is a cetacean; this reflects the better quality of the human genome. One exception was the finless porpoise, due to the CDS data for this species being generated indirectly by SNP calling against bottlenose dolphin genomic sequence [4]. Overall, transcriptome sequencing yielded fewer complete CDS sequences compared to genome-based annotation methods (gene prediction or SNP calling). For example, killer whale CDSs derived from genomic data were identified for 7,981 human orthologs, whereas humpback whale CDSs derived from the transcriptome sequenced here matched 2,396 human CDSs.

The collected CDSs of each locus were next aligned as codons using PRANK v.130820 [5] and multiple sequence alignment (MSA) reliability was assessed using GUIDANCE [6]. GUIDANCE assigns scores (from 0 to 1) by comparing a set of MSAs generated by the original alignment algorithm based on bootstrap guide-trees, here 10. When a CDS alignment contained sequences with a score lower than 0.6,

these were pruned from the dataset as unreliable and a new MSA was re-built from the reduced data under the original parameters, as above. Codon sites below a score of 0.93 (GUIDANCE default value) were discarded, as well as sites with gaps in more than 50% of the sequences sampled in the data set. We observed that, in many alignments, the CDS of the minke whale presented long internal deletions, possibly the result of missing exons excluded from the original annotations using gene prediction analyses [4], the accuracy of which for identifying genes in draft genomes is known to be prone to errors [7]. To account for this type of error in our data, regions with deletions in the *B. acutorostrata* sequences were removed from the alignment, plus 10 flanking codon positions upstream and downstream of the indel. Finally, all sequences were trimmed by 10 codons at both the 5' and 3' ends.

**Natural selection analyses.** In addition to the branch-site model MA, we also implemented the clade model C [8, 9] to test for divergent selection pressures acting on one of the following groups in the Laurasiatheria tree [10, 11]: (I) Cetancodonta (Hippopotamidae + Cetacea); (II) Cetacea; (III) Mysticeti and (IV) Odontoceti (Figure 1). Clade model C assumes three classes of sites, which differ in their selection pressure, as measured by dN/dS or  $\omega$ . In the first two site classes,  $\omega$  was constrained to be under purifying selection ( $0 < \omega_0 < 1$ ) or neutral ( $\omega_1 = 1$ ), while in the third class,  $\omega$  was estimated separately in foreground ( $\omega_2$ ) and background ( $\omega_3$ ) branches without constraint. Likelihood ratio tests (LRT) were used to assess the model fit of the clade models over the null model M1a (Nearly Neutral), in which two sites are constrained to fall into two classes, negatively selected ( $\omega < 1$ ) or neutral ( $\omega = 1$ ). In all LRTs log-likelihood differences were compared to the  $\chi^2$  distribution for a critical value  $\alpha = 0.05$  with three degrees of freedom (df). In cases where Model C had a significantly better fit over the null, only sites with a Bayes empirical Bayes (BEB) posterior probability  $> 0.80$  were considered as significant.

We first applied the clade model C to test for divergent selection between Cetancodonta and the rest of the tree (Clade I in Figure 1). Among 6,894 loci tested, we identified 3,180 for which model C had a better overall fit when compared to the null model prior to any correction for multiple testing (see Additional file 2). Likewise, we also applied model C to each of the Cetacea, Mysticeti and Odontoceti clades (Clades II, III and IV, respectively in Figure 1) and found divergent selection pressures acting on between 4,402 and 5,635 CDSs. Overall, between 1,132 and 2,123 genes had sites with a dN/dS or  $\omega > 1$  in each of the four clades of interest (see Additional file 2). After filtering for potential false positives (see Material and Methods and Additional file 2), we report 2,169 coding gene sequences under divergent selection in Cetancodonta using Model C. Of these genes, 392 show positively selected sites (PSSs), for which  $\omega > 1$  in the foreground clade (see Additional files 2-3). We also recovered ~3,600 genes showing evidence of divergent selection acting only in cetaceans, among which 487 to 732 genes exhibited sites with  $\omega > 1$  on the ancestral cetacean, ancestral odontocete, or ancestral mysticete branches (see Additional files 2-3).

**GC content estimation.** To control for CpG islands, also known to inflate inferences of natural selection in mammalian genome data, we used the program nhPhyml [12, 13] to infer the GC content at the third codon position (GC3) at each node of the laurasiatherian tree for every CDS dataset (topology was fixed, alpha parameter estimated with four distinct categories and GC equilibrium optimized). We next calculated the shift in GC3 along the five branches ( $\Delta\text{GC3}$ ) tested for positive selection (Figure 1), by subtracting the GC3 content between the nodes delineating the branch (as in [14]). To test whether the GC content may have affected our selection results, we calculated the Pearson correlation coefficient between  $\Delta\text{GC3}$  and the  $P$  value obtained by the LRTs for a given branch. We found no significant

correlation between strength of selection and shift in GC, with the exception of a slight negative correlation detected for the ancestral branch of Odontoceti ( $P = 0.0159$ ). In this case the correlation coefficient was very low ( $r = -0.0251$ ), indicating that GC content is unlikely to have biased our selection analyses (see Additional file 2).

**Gene ontology (GO) enrichment analysis.** To investigate whether genes showing evidence of molecular adaptation shared similar functions, we used the topGO package [15] to perform an enrichment analysis for GO terms. Gene annotations for the three major GO domains - cellular component (CC), biological process (BP) and molecular function (MF)- were retrieved using Ensembl BioMart [3]. We asked whether genes with PSSs shared specific functions and performed a series of gene ontology (GO) enrichment analyses of genes showing evidence for molecular adaptations in the ancestral branches of Cetacea (pooling branches ii, iii, iv), Cetancodonta and *H. amphibius*. We used two statistics to look for overrepresented terms: (1) the parametric Fisher's exact test and (2) the non-parametric Kolmogorov-Smirnov or else widely known as gene set enrichment analysis (GSEA). In Fisher's test, we set the significance threshold at genes with  $Q \leq 0.10$ . Both tests were performed following the classic approach, where significance for enrichment was calculated independently for each GO term, as well as using the *elim* and *weight01* algorithms introduced by Alexa et al. 2006 and implemented in the topGO package. Both *elim* and *weight* algorithms were shown to improve the explanatory power of GO group scoring, by eliminating local dependencies between GO terms in the GO graph structure [15].

Using the classic Fisher's exact test to look for overrepresentation of gene sets exhibiting bursts of selection ( $Q \leq 0.10$ ) in cetaceans (pooling branches ii, iii and iv of Figure 1), we detected significant enrichment in 219 GO categories (145 BP, 28 CC, 46 MF; see Additional files 4-5). Among these, the majority of terms was associated with immunity, e.g. genes involved in T cell activation (GO:0002286), T cell homeostasis (GO:0043029) or T cell apoptotic process (GO:0070231), or genes that were responsible for interferon and interleukin production (e.g. GO:0032607 and GO:0032613, respectively; see Additional files 4-5). Many GO terms were also linked to the nervous system (GO:0048484, GO:0048485) and/or brain development (e.g. GO:0021549, GO:0021575, GO:0021587, GO:0021695, GO:0021696, GO:0048854) in line with previous findings [16-18]. Finally, we found evidence for enrichment in genes involved in olfaction (GO:0021772, GO:0021988) and oxidation-reduction (redox) reaction (e.g., GO:0016701, GO:0016702).

With respect to the last common ancestor of Cetancodonta, we found 35 significantly enriched GO terms for genes showing evidence of positive selection in Cetancodonta (branch i in Figure 1; 8 terms for BP, 25 for CC and 2 MF; see Additional files 4-5). Of these, seven were related to the protein actin that forms the cytoskeleton (GO:0070252, GO:0030048, GO:0030029, GO:0032432, GO:0005884, GO:0015629, GO:0003779) and others were linked to muscle regulation and the sarcomere (GO:0006937, GO:0090257, GO:0006936, GO:0030017; see Additional file 4-5). GO analysis of the one gene found under positive selection in the hippo branch after FDR correction under the model MA (branch ii in Figure 1, see Additional file 4) recovered the term "vesicle", with roles in vesicle coating (GO:0048208, GO:0048199, GO:0006901) and vesicle targeting (GO:0048207, GO:0048199, GO:0006903). Additional GO terms detected in the hippo were associated with immunity, e.g. "antigen processing and presentation via MHC II" (GO:0002495, GO:0002474). Note again our GO results are reflective of the very low number of positively selected genes retained after our filtering steps for false positives. Therefore, we cannot exclude the possibility that a wider range of gene



sets have undergone Darwinian selection in the last common ancestor of hippos and whales.

Next we employed a relaxed approach for identifying functional enrichment associated with increased  $\omega$  in the foreground branch. Applying Kolmogorov-Smirnov (KS) test coupled with the *elim* method of the TopGO package [15], we ranked all genes based on a score drawn by the goodness-of-fit of the MA selection model (Q) and looked for outlier GO sets, as compared to a null distribution GO scores of all loci. This analysis allowed us to detect over- or underrepresented genes in 509 GO categories in Cetacea, 218 terms in Cetancodonta and 213 in *H. amphibius* branches within BP (see Additional file 4). We also found enrichment in 97 and 141 GO terms in all cetaceans within CC and MF domains, respectively. Finally, 44 and 49 GO groups were significantly enriched in hippo and Cetancodonta based on CC domain, whereas 46 in MF in total. A more detailed presentation of all GO terms for each branch and method is provided in Additional file 5. In cetaceans, the majority of GO terms obtained via the KS-elim method based on selection screens seemed to be related to immune response (e.g., GO:0002204, GO:0002208, GO:0002285) and metabolic process (e.g., GO:0006475, GO:0006520, GO:0006541). Analysis of cetacean gene selection results recovered enrichment also in categories related to lipid metabolism (e.g., GO:0042632, GO:0019217, GO:0016126, GO:0019433), blood clotting or platelet formation (e.g., GO:0007596, GO:0050817), muscle, heart and brain development (e.g., GO:0051145, GO:0003205, GO:0030901), response to stress (e.g., GO:0006950, GO:0033554), hypoxia (GO:0036294) and visual perception (GO:0007601), none of which was obtained by gene set enrichment analysis of selection screen at the hippo branch or at the common ancestor of hippos and whales. Some of these GO terms however may include gene clusters for which we had not sampled the hippo sequences.

**Network analysis of protein-protein interactions.** GO terms were grouped into functional categories, using associated key terms as follows: the circulatory system (*heart, cardiac, blood, vessel, circulatory, cardio\**, *coagula\**, *wound, angio\**, *vasocon\**, *vasodil\**, *lymphocyte, leukocyte, hematopoietic, platelet* and *vascular*); nervous system (*brain, neuro\**, *nerv\**, *axon, synap\** and *glial*); fluid regulation (*fluid, storage, water* and *urine*); response to hypoxia (*hypoxia, break, repair, damage, oxygen* and *oxidative stress*); kidneys (*renal, kidney* and *urogenital*); lipids (*lipid, storage* and *cholesterol*); lungs (*lung* and *respiratory*); muscles (*muscle, myofibril* and *muscular*); sensory perception (*sensory, visual, vision, eye, perception, cochlea, phototransduction, light, sound* and *retina*) and the cell cycle (*cell cycle, phase, aging* and *telomer\**).

#### References:

- 1 Grabherr, M. G., Haas, B. J., Yassour, M., Levin, J. Z., Thompson, D. A., Amit, I., Adiconis, X., Fan, L., Raychowdhury, R., Zeng, Q., *et al.* 2011 Full-length transcriptome assembly from RNA-Seq data without a reference genome. *Nat Biotechnol.* **29**, 644-652. (10.1038/nbt.1883)
- 2 Holt, C., Yandell, M. 2011 MAKER2: an annotation pipeline and genome-database management tool for second-generation genome projects. *BMC bioinform.* **12**, 491. (10.1186/1471-2105-12-491)
- 3 Kinsella, R. J., Kahari, A., Haider, S., Zamora, J., Proctor, G., Spudich, G., Almeida-King, J., Staines, D., Derwent, P., Kerhornou, A., *et al.* 2011 Ensembl BioMarts: a hub for data retrieval across taxonomic space. *Database : j biol datab cur.* **2011**, bar030. (10.1093/database/bar030)
- 4 Yim, H. S., Cho, Y. S., Guang, X. M., Kang, S. G., Jeong, J. Y., Cha, S. S., Oh, H. M., Lee, J. H., Yang, E. C., Kwon, K. K., *et al.* 2014 Minke whale genome and aquatic adaptation in cetaceans. *Nat Genet.* **46**, 88-+. (Doi 10.1038/Ng.2835)

- 5 Loytynoja, A., Goldman, N. 2005 An algorithm for progressive multiple alignment of sequences with insertions. *PNAS*. **102**, 10557-10562. (10.1073/pnas.0409137102)
- 6 Penn, O., Privman, E., Ashkenazy, H., Landan, G., Graur, D., Pupko, T. 2010 GUIDANCE: a web server for assessing alignment confidence scores. *Nucl acid res.* **38**, W23-28. (10.1093/nar/gkq443)
- 7 Yandell, M., Ence, D. 2012 A beginner's guide to eukaryotic genome annotation. *Nat Rev Genet.* **13**, 329-342. (10.1038/nrg3174)
- 8 Yang, Z. H. 2007 PAML 4: Phylogenetic analysis by maximum likelihood. *Mol Biol Evol.* **24**, 1586-1591. (Doi 10.1093/Molbev/Msm088)
- 9 Zhang, J. Z., Nielsen, R., Yang, Z. H. 2005 Evaluation of an improved branch-site likelihood method for detecting positive selection at the molecular level. *Mol Biol Evol.* **22**, 2472-2479. (Doi 10.1093/Molbev/Msi237)
- 10 McGowen, M. R., Spaulding, M., Gatesy, J. 2009 Divergence date estimation and a comprehensive molecular tree of extant cetaceans. *Mol phyl evol.* **53**, 891-906. (Doi 10.1016/J.Ympev.2009.08.018)
- 11 Tsagkogeorga, G., Parker, J., Stupka, E., Cotton, J. A., Rossiter, S. J. 2013 Phylogenomic analyses elucidate the evolutionary relationships of bats. *Curr Biol.* **23**, 2262-2267. (10.1016/j.cub.2013.09.014)
- 12 Boussau, B., Gouy, M. 2006 Efficient likelihood computations with nonreversible models of evolution. *Syst Biol.* **55**, 756-768. (Doi 10.1080/10635150600975218)
- 13 Galtier, N., Gouy, M. 1998 Inferring pattern and process: Maximum-likelihood implementation of a nonhomogeneous model of DNA sequence evolution for phylogenetic analysis. *Mol Biol Evol.* **15**, 871-879.
- 14 Roux, J., Privman, E., Moretti, S., Daub, J. T., Robinson-Rechavi, M., Keller, L. 2014 Patterns of positive selection in seven ant genomes. *Mol Biol Evol.* **31**, 1661-1685. (Doi 10.1093/Molbev/Msu141)
- 15 Alexa, A., Rahnenfuhrer, J., Lengauer, T. 2006 Improved scoring of functional groups from gene expression data by decorrelating GO graph structure. *Bioinform.* **22**, 1600-1607. (Doi 10.1093/Bioinformatics/Btl140)
- 16 McGowen, M. R., Grossman, L. I., Wildman, D. E. 2012 Dolphin genome provides evidence for adaptive evolution of nervous system genes and a molecular rate slowdown. *P R Soc B.* **279**, 3643-3651. (Doi 10.1098/Rspb.2012.0869)
- 17 Nery, M. F., Gonzalez, D. J., Opazo, J. C. 2013 How to make a dolphin: molecular signature of positive selection in cetacean genome. *PloS one.* **8**, (ARTN e65491 DOI 10.1371/journal.pone.0065491)
- 18 Sun, Y. B., Zhou, W. P., Liu, H. Q., Irwin, D. M., Shen, Y. Y., Zhang, Y. P. 2013 Genome-wide scans for candidate genes in the aquatic adaptation of dolphins. *Gen Biol Evol.* **5**, 130-139. (Doi 10.1093/Gbe/Evs123)

**Table S1.** RNA extraction QC, RNA-Seq and assembly statistics

|                               | <i>H. amphibius</i> | <i>H. amphibius</i> | <i>H. amphibius</i> | <i>M. novaeangliae</i> |
|-------------------------------|---------------------|---------------------|---------------------|------------------------|
| Concentration (ng/ $\mu$ L)   | 1,026               | 189                 | 1,797               | 4,014                  |
| Volume ( $\mu$ L)             | 25                  | 25                  | 35                  | 30                     |
| Total Mass ( $\mu$ g)         | 25.65               | 4.73                | 62.9                | 120.42                 |
| RIN                           | 2.4                 | 2.7                 | 3                   | 6                      |
| 28S/18S                       | 0.7                 | 0                   | 0                   | 0                      |
| Total # reads                 | 19,332,863          | 20,818,962          | 20,318,928          | 19,402,616             |
| Total (bp)                    | 3,479,915,340       | 3,747,413,160       | 3,657,407,040       | 3,492,470,880          |
| Q20 %                         | 97.97%              | 97.95%              | 97.88%              | 98.24%                 |
| N %                           | 0%                  | 0%                  | 0%                  | 0.01%                  |
| GC %                          | 47.49%              | 45.54%              | 47.13%              | 45.89%                 |
| Total # assembled transcripts |                     |                     | 154,931             | 290,984                |
| Contig N50 (bp)               |                     |                     | 720                 | 573                    |

**Table S2.** Ortholog identification

| Species                                                 | Data type; Annotation            | Reciprocal blast vs dolphin<br><i>T. truncatus</i> ( $\Sigma g = 16,549^*$ ) |            | Reciprocal blast vs human<br><i>H. sapiens</i> ( $\Sigma g = 23,658^*$ ) |            | #Total<br>candidate orthologs |
|---------------------------------------------------------|----------------------------------|------------------------------------------------------------------------------|------------|--------------------------------------------------------------------------|------------|-------------------------------|
|                                                         |                                  | $\geq 50\%$ coverage                                                         | (complete) | $\geq 50\%$ coverage                                                     | (complete) |                               |
| HIPPOPOTAMIDAE                                          |                                  |                                                                              |            |                                                                          |            |                               |
| Hippopotamus<br><i>Hippopotamus amphibius</i>           | RNA-seq; <i>de novo</i> assembly | 7,394                                                                        | (2,707)    | 7,921                                                                    | (2,719)    | <b>10,834</b>                 |
| CETACEA                                                 |                                  |                                                                              |            |                                                                          |            |                               |
| MYSTICETI                                               |                                  |                                                                              |            |                                                                          |            |                               |
| Humpback whale<br><i>Megaptera novaeangliae</i>         | RNA-seq; <i>de novo</i> assembly | 7,831                                                                        | (2,479)    | 8,314                                                                    | (2,396)    | <b>10,875</b>                 |
| Minke whale<br><i>Balaenoptera acutorostrata</i>        | genomic; gene prediction         | 12,940                                                                       | (7,747)    | 14,067                                                                   | (8,344)    | <b>14,234</b>                 |
| Fin whale<br><i>Balaenoptera physalus</i>               | genomic; SNP calling             | 12,908                                                                       | (7,647)    | 14,016                                                                   | (8,219)    | <b>14,056</b>                 |
| ODONTOCETI                                              |                                  |                                                                              |            |                                                                          |            |                               |
| Yangtze river dolphin<br><i>Lipotes vexillifer</i>      | genomic; gene prediction         | 11,543                                                                       | (4,787)    | 12,865                                                                   | (5,367)    | <b>13,635</b>                 |
| Finless porpoise<br><i>Neophocaena phocaenoides</i>     | genomic; SNP calling             | 16,047                                                                       | (13,064)   | 15,082                                                                   | (9,881)    | <b>14,868</b>                 |
| Killer whale<br><i>Orcinus orca</i>                     | genomic; gene prediction         | 9,323                                                                        | (7,281)    | 9,476                                                                    | (7,981)    | <b>9,267</b>                  |
| Indo-Pacific humpback dolphin<br><i>Sousa chinensis</i> | RNA-seq; <i>de novo</i> assembly | 6,249                                                                        | (2,409)    | 6,667                                                                    | (2,425)    | <b>9,360</b>                  |
| Sperm whale<br><i>Physeter macrocephalus</i>            | RNA-seq; <i>de novo</i> assembly | 9,493                                                                        | (3,461)    | 10,114                                                                   | (3,609)    | <b>11,782</b>                 |

\*translated protein-coding genes

**Table S3.** Genome-wide analysis for bursts of divergent selection

|                    | Initial screen for selection |                        |                                    | Filtering<br># Datasets<br>Med PSSs ≤ 10 | # Genes showing evidence of natural selection |                        |                                    |                        |
|--------------------|------------------------------|------------------------|------------------------------------|------------------------------------------|-----------------------------------------------|------------------------|------------------------------------|------------------------|
|                    | # Total<br>Datasets          | $\omega \neq \omega_0$ | $\omega \neq \omega_0, \omega > 1$ |                                          | $p\text{-val} < 0.05$                         | $\omega \neq \omega_0$ | $\omega \neq \omega_0, \omega > 1$ | $\omega \neq \omega_0$ |
| Clade model C      |                              |                        |                                    |                                          |                                               |                        |                                    |                        |
| Cetancodonta clade | 6,894                        | 3,180                  | 1,132                              | 462                                      | 2,235                                         | <b>412</b>             | 2,169                              | <b>392</b>             |
| Cetacea clade      | 11,992                       | 5,635                  | 2,123                              | 901                                      | 3,967                                         | <b>761</b>             | 3,872                              | <b>732</b>             |
| Mysticeti clade    | 11,992                       | 4,402                  | 1,252                              | 519                                      | 3,577                                         | <b>539</b>             | 3,386                              | <b>487</b>             |
| Odontoceti clade   | 11,992                       | 4,614                  | 1,436                              | 469                                      | 3,762                                         | <b>732</b>             | 3,623                              | <b>701</b>             |
|                    |                              |                        |                                    | # Genes excluded =<br>2,063              |                                               |                        |                                    |                        |

**Table S4.** Pearson correlation test between MA model fit (LRT  $p$ -values) and  $\Delta$ GC3 at the third codon position of the branch

| Branch tested                              | Correlation coefficient ( $r$ ) | $p$ -value    |
|--------------------------------------------|---------------------------------|---------------|
| Ancestral Cetancodonta (hippo + cetaceans) | -0.0081                         | 0.5537        |
| Ancestral Cetacea                          | -0.0059                         | 0.5683        |
| Ancestral Mysticeti                        | -0.0134                         | 0.1997        |
| Ancestral Odontoceti                       | <b>-0.0251</b>                  | <b>0.0159</b> |
| <i>H. amphibius</i> terminal branch        | 0.0054                          | 0.6944        |

**Table S7A.** TopGO enrichment results for positively selected genes based on p-values from the branch-site model.

| Branch tested          | Biological Process (BP) |            | Cellular Component (CC) |           | Molecular Function (MF) |            |
|------------------------|-------------------------|------------|-------------------------|-----------|-------------------------|------------|
|                        | Fisher Classic          | KS Elim    | Fisher Classic          | KS Elim   | Fisher Classic          | KS Elim    |
| Ancestral Cetancodonta | 8                       | 218        | 25                      | 49        | 2                       | 46         |
| <i>H. amphibius</i>    | 43                      | 215        | 8                       | 44        | 1                       | 46         |
| Ancestral Cetacea      | 44                      | 389        | 12                      | 73        | 20                      | 118        |
| Ancestral Mysticeti    | 38                      | 401        | 13                      | 73        | 10                      | 111        |
| Ancestral Odontoceti   | 80                      | 417        | 3                       | 82        | 19                      | 115        |
| <i>Union:</i>          | 145                     | <b>509</b> | 28                      | <b>97</b> | 46                      | <b>141</b> |

**Table S7B.** GO terms found enriched in positively selected genes in hippo and whales, based on Fisher's exact test.

| GO ID      | GO domain | Term                                | (iv) Cetancodonta |
|------------|-----------|-------------------------------------|-------------------|
| GO:0070252 | BP        | actin-mediated cell contraction     | 0.0032            |
| GO:0030048 | BP        | actin filament-based movement       | 0.0047            |
| GO:0006937 | BP        | regulation of muscle contraction    | 0.0074            |
| GO:0090257 | BP        | regulation of muscle system process | 0.0096            |
| GO:0006936 | BP        | muscle contraction                  | 0.0179            |
| GO:0044057 | BP        | regulation of system process        | 0.0189            |
| GO:0003012 | BP        | muscle system process               | 0.0219            |
| GO:0030029 | BP        | actin filament-based process        | 0.0385            |
| GO:0002102 | CC        | podosome                            | 0.0020            |
| GO:0001725 | CC        | stress fiber                        | 0.0030            |
| GO:0030863 | CC        | cortical cytoskeleton               | 0.0030            |
| GO:0032154 | CC        | cleavage furrow                     | 0.0030            |
| GO:0032432 | CC        | actin filament bundle               | 0.0030            |
| GO:0005884 | CC        | actin filament                      | 0.0034            |
| GO:0032153 | CC        | cell division site                  | 0.0034            |
| GO:0032155 | CC        | cell division site part             | 0.0034            |
| GO:0042641 | CC        | actomyosin                          | 0.0034            |
| GO:0005604 | CC        | basement membrane                   | 0.0059            |
| GO:0030426 | CC        | growth cone                         | 0.0065            |
| GO:0044448 | CC        | cell cortex part                    | 0.0065            |
| GO:0030427 | CC        | site of polarized growth            | 0.0069            |
| GO:0044420 | CC        | extracellular matrix part           | 0.0097            |
| GO:0030017 | CC        | sarcomere                           | 0.0105            |
| GO:0044449 | CC        | contractile fiber part              | 0.0115            |
| GO:0030016 | CC        | myofibril                           | 0.0129            |
| GO:0043292 | CC        | contractile fiber                   | 0.0133            |
| GO:0005938 | CC        | cell cortex                         | 0.0143            |
| GO:0005578 | CC        | proteinaceous extracellular matrix  | 0.0168            |
| GO:0031012 | CC        | extracellular matrix                | 0.0198            |
| GO:0015629 | CC        | actin cytoskeleton                  | 0.0244            |
| GO:0044463 | CC        | cell projection part                | 0.0347            |
| GO:0043005 | CC        | neuron projection                   | 0.0408            |
| GO:0097458 | CC        | neuron part                         | 0.0485            |
| GO:0003779 | MF        | actin binding                       | 0.0230            |

GO:0008092      MF                      cytoskeletal protein binding                      0.0460

**Table S7C.** GO terms enriched in positively selected genes in the hippo, based on Fisher's exact test.

| GO ID      | GO domain | Term                                                                                      | (v) Hippo |
|------------|-----------|-------------------------------------------------------------------------------------------|-----------|
| GO:0048207 | BP        | vesicle targeting, rough ER to cis-Golgi                                                  | 0.0051    |
| GO:0048208 | BP        | COPII vesicle coating                                                                     | 0.0051    |
| GO:0090114 | BP        | COPII-coated vesicle budding                                                              | 0.0051    |
| GO:0048199 | BP        | vesicle targeting, to, from or within Golgi                                               | 0.0090    |
| GO:0006901 | BP        | vesicle coating                                                                           | 0.0098    |
| GO:1902591 | BP        | single-organism membrane budding                                                          | 0.0098    |
| GO:0006903 | BP        | vesicle targeting                                                                         | 0.0111    |
| GO:0006900 | BP        | membrane budding                                                                          | 0.0119    |
| GO:0051592 | BP        | response to calcium ion                                                                   | 0.0136    |
| GO:0042787 | BP        | protein ubiquitination involved in ubiquitin-dependent protein catabolic process          | 0.0141    |
| GO:0006888 | BP        | ER to Golgi vesicle-mediated transport                                                    | 0.0153    |
| GO:0002495 | BP        | antigen processing and presentation of peptide antigen via MHC class II                   | 0.0158    |
| GO:0002504 | BP        | antigen processing and presentation of peptide or polysaccharide antigen via MHC class II | 0.0158    |
| GO:0019886 | BP        | antigen processing and presentation of exogenous peptide antigen via MHC class II         | 0.0158    |
| GO:0006987 | BP        | activation of signaling protein activity involved in unfolded protein response            | 0.0174    |
| GO:0032075 | BP        | positive regulation of nuclease activity                                                  | 0.0179    |
| GO:0032069 | BP        | regulation of nuclease activity                                                           | 0.0183    |
| GO:0002474 | BP        | antigen processing and presentation of peptide antigen via MHC class I                    | 0.0217    |
| GO:0030968 | BP        | endoplasmic reticulum unfolded protein response                                           | 0.0217    |
| GO:0016050 | BP        | vesicle organization                                                                      | 0.0221    |
| GO:0034620 | BP        | cellular response to unfolded protein                                                     | 0.0221    |
| GO:0035967 | BP        | cellular response to topologically incorrect protein                                      | 0.0225    |
| GO:0018279 | BP        | protein N-linked glycosylation via asparagine                                             | 0.0234    |
| GO:0051650 | BP        | establishment of vesicle localization                                                     | 0.0234    |
| GO:0018196 | BP        | peptidyl-asparagine modification                                                          | 0.0238    |
| GO:0051648 | BP        | vesicle localization                                                                      | 0.0242    |
| GO:0006984 | BP        | ER-nucleus signaling pathway                                                              | 0.0246    |
| GO:0006487 | BP        | protein N-linked glycosylation                                                            | 0.0255    |
| GO:0034976 | BP        | response to endoplasmic reticulum stress                                                  | 0.0301    |
| GO:0002478 | BP        | antigen processing and presentation of exogenous peptide antigen                          | 0.0318    |
| GO:0006986 | BP        | response to unfolded protein                                                              | 0.0318    |
| GO:0019884 | BP        | antigen processing and presentation of exogenous antigen                                  | 0.0322    |
| GO:0035966 | BP        | response to topologically incorrect protein                                               | 0.0322    |
| GO:0010038 | BP        | response to metal ion                                                                     | 0.0335    |
| GO:0048002 | BP        | antigen processing and presentation of peptide antigen                                    | 0.0335    |
| GO:0051656 | BP        | establishment of organelle localization                                                   | 0.0343    |
| GO:0019882 | BP        | antigen processing and presentation                                                       | 0.0347    |
| GO:0007283 | BP        | spermatogenesis                                                                           | 0.0402    |
| GO:0043687 | BP        | post-translational protein modification                                                   | 0.0402    |
| GO:0048232 | BP        | male gamete generation                                                                    | 0.0406    |
| GO:0051640 | BP        | organelle localization                                                                    | 0.0423    |

|            |    |                                        |        |
|------------|----|----------------------------------------|--------|
| GO:0048193 | BP | Golgi vesicle transport                | 0.0427 |
| GO:0010035 | BP | response to inorganic substance        | 0.0469 |
| GO:0012507 | CC | ER to Golgi transport vesicle membrane | 0.0061 |
| GO:0030134 | CC | ER to Golgi transport vesicle          | 0.0091 |
| GO:0030120 | CC | vesicle coat                           | 0.0133 |
| GO:0030658 | CC | transport vesicle membrane             | 0.0133 |
| GO:0030117 | CC | membrane coat                          | 0.0242 |
| GO:0048475 | CC | coated membrane                        | 0.0242 |
| GO:0030662 | CC | coated vesicle membrane                | 0.0296 |
| GO:0030133 | CC | transport vesicle                      | 0.0313 |
| GO:0048306 | MF | calcium-dependent protein binding      | 0.0062 |

**Table S7D.** GO terms enriched for positively selected genes in cetaceans, based on Fisher's exact test.

| GO ID      | GO domain | Term                                                                        | (i) Cetacea | (ii) Mysticeti | (iii) Odontoceti |
|------------|-----------|-----------------------------------------------------------------------------|-------------|----------------|------------------|
| GO:0000086 | BP        | G2/M transition of mitotic cell cycle                                       | 0.0029      | 0.0216         | 0.0103           |
| GO:0000226 | BP        | microtubule cytoskeleton organization                                       | 0.0139      | NS             | NS               |
| GO:0001539 | BP        | ciliary or bacterial-type flagellar motility                                | NS          | NS             | 0.0260           |
| GO:0001755 | BP        | neural crest cell migration                                                 | NS          | 0.0486         | NS               |
| GO:0001763 | BP        | morphogenesis of a branching structure                                      | NS          | 0.0493         | NS               |
| GO:0001816 | BP        | cytokine production                                                         | NS          | NS             | 0.0085           |
| GO:0001817 | BP        | regulation of cytokine production                                           | NS          | NS             | 0.0068           |
| GO:0001818 | BP        | negative regulation of cytokine production                                  | NS          | NS             | 0.0059           |
| GO:0001906 | BP        | cell killing                                                                | 0.0238      | NS             | NS               |
| GO:0001909 | BP        | leukocyte mediated cytotoxicity                                             | 0.0209      | NS             | NS               |
| GO:0002228 | BP        | natural killer cell mediated immunity                                       | 0.0130      | NS             | NS               |
| GO:0002252 | BP        | immune effector process                                                     | 0.0229      | NS             | NS               |
| GO:0002260 | BP        | lymphocyte homeostasis                                                      | NS          | NS             | 0.0497           |
| GO:0002286 | BP        | T cell activation involved in immune response                               | NS          | NS             | 0.0443           |
| GO:0002287 | BP        | alpha-beta T cell activation involved in immune response                    | NS          | NS             | 0.0352           |
| GO:0002292 | BP        | T cell differentiation involved in immune response                          | NS          | NS             | 0.0352           |
| GO:0002293 | BP        | alpha-beta T cell differentiation involved in immune response               | NS          | NS             | 0.0352           |
| GO:0002294 | BP        | CD4-positive, alpha-beta T cell differentiation involved in immune response | NS          | NS             | 0.0334           |
| GO:0002367 | BP        | cytokine production involved in immune response                             | NS          | NS             | 0.0443           |
| GO:0002718 | BP        | regulation of cytokine production involved in immune response               | NS          | NS             | 0.0388           |
| GO:0002753 | BP        | cytoplasmic pattern recognition receptor signaling pathway                  | NS          | NS             | 0.0443           |
| GO:0002831 | BP        | regulation of response to biotic stimulus                                   | 0.0471      | NS             | NS               |
| GO:0002833 | BP        | positive regulation of response to biotic stimulus                          | NS          | 0.0273         | NS               |
| GO:0006457 | BP        | protein folding                                                             | 0.0057      | NS             | NS               |
| GO:0006458 | BP        | 'de novo' protein folding                                                   | 0.0307      | NS             | NS               |
| GO:0006928 | BP        | cellular component movement                                                 | 0.0430      | NS             | NS               |
| GO:0007017 | BP        | microtubule-based process                                                   | 0.0289      | NS             | NS               |
| GO:0007051 | BP        | spindle organization                                                        | 0.0013      | NS             | NS               |



|            |    |                                                           |        |        |        |
|------------|----|-----------------------------------------------------------|--------|--------|--------|
| GO:0007156 | BP | homophilic cell adhesion                                  | NS     | NS     | 0.0060 |
| GO:0007157 | BP | heterophilic cell-cell adhesion                           | NS     | NS     | 0.0260 |
| GO:0007260 | BP | tyrosine phosphorylation of STAT protein                  | NS     | NS     | 0.0334 |
| GO:0007566 | BP | embryo implantation                                       | NS     | NS     | 0.0443 |
| GO:0009072 | BP | aromatic amino acid family metabolic process              | NS     | 0.0459 | NS     |
| GO:0009074 | BP | aromatic amino acid family catabolic process              | NS     | 0.0326 | NS     |
| GO:0009890 | BP | negative regulation of biosynthetic process               | NS     | NS     | 0.0282 |
| GO:0010558 | BP | negative regulation of macromolecule biosynthetic process | NS     | NS     | 0.0237 |
| GO:0010559 | BP | regulation of glycoprotein biosynthetic process           | NS     | NS     | 0.0315 |
| GO:0016337 | BP | cell-cell adhesion                                        | NS     | NS     | 0.0094 |
| GO:0016339 | BP | calcium-dependent cell-cell adhesion                      | NS     | NS     | 0.0279 |
| GO:0016925 | BP | protein sumoylation                                       | NS     | NS     | 0.0334 |
| GO:0021549 | BP | cerebellum development                                    | 0.0491 | NS     | NS     |
| GO:0021575 | BP | hindbrain morphogenesis                                   | 0.0268 | NS     | 0.0497 |
| GO:0021587 | BP | cerebellum morphogenesis                                  | 0.0238 | NS     | 0.0443 |
| GO:0021695 | BP | cerebellar cortex development                             | 0.0258 | NS     | 0.0479 |
| GO:0021696 | BP | cerebellar cortex morphogenesis                           | 0.0179 | 0.0486 | 0.0334 |
| GO:0021772 | BP | olfactory bulb development                                | 0.0159 | 0.0433 | 0.0297 |
| GO:0021988 | BP | olfactory lobe development                                | 0.0169 | 0.0459 | 0.0315 |
| GO:0030030 | BP | cell projection organization                              | NS     | 0.0249 | NS     |
| GO:0030031 | BP | cell projection assembly                                  | NS     | NS     | 0.0266 |
| GO:0030318 | BP | melanocyte differentiation                                | NS     | 0.0433 | NS     |
| GO:0031327 | BP | negative regulation of cellular biosynthetic process      | NS     | NS     | 0.0271 |
| GO:0032091 | BP | negative regulation of protein binding                    | 0.0199 | NS     | NS     |
| GO:0032319 | BP | regulation of Rho GTPase activity                         | NS     | 0.0183 | NS     |
| GO:0032320 | BP | positive regulation of Ras GTPase activity                | NS     | 0.0231 | NS     |
| GO:0032321 | BP | positive regulation of Rho GTPase activity                | NS     | 0.0095 | NS     |
| GO:0032480 | BP | negative regulation of type I interferon production       | NS     | NS     | 0.0334 |
| GO:0032607 | BP | interferon-alpha production                               | NS     | NS     | 0.0187 |
| GO:0032608 | BP | interferon-beta production                                | NS     | NS     | 0.0425 |
| GO:0032613 | BP | interleukin-10 production                                 | NS     | NS     | 0.0242 |
| GO:0032615 | BP | interleukin-12 production                                 | NS     | NS     | 0.0461 |
| GO:0032635 | BP | interleukin-6 production                                  | 0.0336 | NS     | NS     |
| GO:0032647 | BP | regulation of interferon-alpha production                 | NS     | NS     | 0.0187 |
| GO:0032648 | BP | regulation of interferon-beta production                  | NS     | NS     | 0.0406 |
| GO:0032653 | BP | regulation of interleukin-10 production                   | NS     | NS     | 0.0224 |
| GO:0032655 | BP | regulation of interleukin-12 production                   | NS     | NS     | 0.0443 |
| GO:0032675 | BP | regulation of interleukin-6 production                    | 0.0336 | NS     | NS     |
| GO:0032728 | BP | positive regulation of interferon-beta production         | NS     | NS     | 0.0279 |
| GO:0032956 | BP | regulation of actin cytoskeleton organization             | NS     | 0.0414 | NS     |
| GO:0032990 | BP | cell part morphogenesis                                   | NS     | 0.0348 | NS     |
| GO:0034381 | BP | plasma lipoprotein particle clearance                     | 0.0179 | NS     | NS     |
| GO:0035023 | BP | regulation of Rho protein signal transduction             | NS     | 0.0414 | NS     |

|            |    |                                                                                 |        |        |        |
|------------|----|---------------------------------------------------------------------------------|--------|--------|--------|
| GO:0036230 | BP | granulocyte activation                                                          | NS     | 0.0326 | NS     |
| GO:0039528 | BP | cytoplasmic pattern recognition receptor signaling pathway in response to virus | NS     | 0.0273 | 0.0187 |
| GO:0042035 | BP | regulation of cytokine biosynthetic process                                     | 0.0462 | NS     | NS     |
| GO:0042036 | BP | negative regulation of cytokine biosynthetic process                            | 0.0169 | NS     | 0.0315 |
| GO:0042058 | BP | regulation of epidermal growth factor receptor signaling pathway                | 0.0394 | NS     | NS     |
| GO:0042059 | BP | negative regulation of epidermal growth factor receptor signaling pathway       | 0.0248 | NS     | NS     |
| GO:0042088 | BP | T-helper 1 type immune response                                                 | NS     | NS     | 0.0242 |
| GO:0042089 | BP | cytokine biosynthetic process                                                   | 0.0471 | NS     | NS     |
| GO:0042093 | BP | T-helper cell differentiation                                                   | NS     | NS     | 0.0334 |
| GO:0042107 | BP | cytokine metabolic process                                                      | 0.0481 | NS     | NS     |
| GO:0042119 | BP | neutrophil activation                                                           | NS     | 0.0326 | NS     |
| GO:0042267 | BP | natural killer cell mediated cytotoxicity                                       | 0.0130 | NS     | NS     |
| GO:0043029 | BP | T cell homeostasis                                                              | NS     | NS     | 0.0297 |
| GO:0043367 | BP | CD4-positive, alpha-beta T cell differentiation                                 | NS     | NS     | 0.0479 |
| GO:0043370 | BP | regulation of CD4-positive, alpha-beta T cell differentiation                   | NS     | NS     | 0.0315 |
| GO:0043547 | BP | positive regulation of GTPase activity                                          | NS     | 0.0446 | NS     |
| GO:0043900 | BP | regulation of multi-organism process                                            | NS     | 0.0300 | NS     |
| GO:0043902 | BP | positive regulation of multi-organism process                                   | NS     | 0.0059 | NS     |
| GO:0044770 | BP | cell cycle phase transition                                                     | 0.0258 | NS     | NS     |
| GO:0044772 | BP | mitotic cell cycle phase transition                                             | 0.0256 | NS     | NS     |
| GO:0044839 | BP | cell cycle G2/M phase transition                                                | 0.0029 | 0.0216 | 0.0103 |
| GO:0045581 | BP | negative regulation of T cell differentiation                                   | NS     | NS     | 0.0297 |
| GO:0045620 | BP | negative regulation of lymphocyte differentiation                               | NS     | NS     | 0.0352 |
| GO:0045622 | BP | regulation of T-helper cell differentiation                                     | NS     | NS     | 0.0242 |
| GO:0045661 | BP | regulation of myoblast differentiation                                          | NS     | NS     | 0.0315 |
| GO:0046040 | BP | IMP metabolic process                                                           | NS     | 0.0300 | NS     |
| GO:0046636 | BP | negative regulation of alpha-beta T cell activation                             | NS     | NS     | 0.0187 |
| GO:0046637 | BP | regulation of alpha-beta T cell differentiation                                 | NS     | NS     | 0.0479 |
| GO:0048484 | BP | enteric nervous system development                                              | NS     | 0.0273 | NS     |
| GO:0048485 | BP | sympathetic nervous system development                                          | NS     | 0.0326 | NS     |
| GO:0048741 | BP | skeletal muscle fiber development                                               | NS     | NS     | 0.0497 |
| GO:0048742 | BP | regulation of skeletal muscle fiber development                                 | NS     | NS     | 0.0388 |
| GO:0048747 | BP | muscle fiber development                                                        | NS     | 0.0046 | NS     |
| GO:0048846 | BP | axon extension involved in axon guidance                                        | NS     | 0.0353 | NS     |
| GO:0048854 | BP | brain morphogenesis                                                             | 0.0209 | NS     | 0.0370 |
| GO:0048858 | BP | cell projection morphogenesis                                                   | NS     | 0.0324 | NS     |
| GO:0050688 | BP | regulation of defense response to virus                                         | 0.0375 | NS     | NS     |
| GO:0050690 | BP | regulation of defense response to virus by virus                                | 0.0159 | NS     | NS     |
| GO:0051084 | BP | 'de novo' posttranslational protein folding                                     | 0.0277 | NS     | NS     |
| GO:0051100 | BP | negative regulation of binding                                                  | 0.0404 | NS     | NS     |
| GO:0051146 | BP | striated muscle cell differentiation                                            | NS     | 0.0480 | NS     |

|            |    |                                                                                   |        |        |        |
|------------|----|-----------------------------------------------------------------------------------|--------|--------|--------|
| GO:0051148 | BP | negative regulation of muscle cell differentiation                                | NS     | NS     | 0.0425 |
| GO:0051225 | BP | spindle assembly                                                                  | 0.0297 | NS     | NS     |
| GO:0051241 | BP | negative regulation of multicellular organismal process                           | NS     | NS     | 0.0457 |
| GO:0051489 | BP | regulation of filopodium assembly                                                 | NS     | NS     | 0.0370 |
| GO:0051491 | BP | positive regulation of filopodium assembly                                        | NS     | NS     | 0.0279 |
| GO:0055001 | BP | muscle cell development                                                           | NS     | 0.0207 | NS     |
| GO:0055002 | BP | striated muscle cell development                                                  | NS     | 0.0183 | NS     |
| GO:0060008 | BP | Sertoli cell differentiation                                                      | 0.0110 | NS     | NS     |
| GO:0060271 | BP | cilium morphogenesis                                                              | NS     | 0.0197 | NS     |
| GO:0060396 | BP | growth hormone receptor signaling pathway                                         | NS     | NS     | 0.0315 |
| GO:0060397 | BP | JAK-STAT cascade involved in growth hormone signaling pathway                     | NS     | NS     | 0.0242 |
| GO:0060416 | BP | response to growth hormone                                                        | NS     | NS     | 0.0388 |
| GO:0061138 | BP | morphogenesis of a branching epithelium                                           | NS     | 0.0459 | NS     |
| GO:0070227 | BP | lymphocyte apoptotic process                                                      | NS     | NS     | 0.0479 |
| GO:0070228 | BP | regulation of lymphocyte apoptotic process                                        | NS     | NS     | 0.0406 |
| GO:0070229 | BP | negative regulation of lymphocyte apoptotic process                               | NS     | NS     | 0.0242 |
| GO:0070231 | BP | T cell apoptotic process                                                          | NS     | NS     | 0.0370 |
| GO:0070232 | BP | regulation of T cell apoptotic process                                            | NS     | NS     | 0.0297 |
| GO:0070242 | BP | thymocyte apoptotic process                                                       | NS     | NS     | 0.0187 |
| GO:0070670 | BP | response to interleukin-4                                                         | NS     | NS     | 0.0297 |
| GO:0070925 | BP | organelle assembly                                                                | 0.0120 | NS     | NS     |
| GO:0071353 | BP | cellular response to interleukin-4                                                | NS     | NS     | 0.0297 |
| GO:0071378 | BP | cellular response to growth hormone stimulus                                      | NS     | NS     | 0.0315 |
| GO:0071526 | BP | semaphorin-plexin signaling pathway                                               | NS     | 0.0300 | NS     |
| GO:0097006 | BP | regulation of plasma lipoprotein particle levels                                  | 0.0326 | NS     | NS     |
| GO:0098586 | BP | cellular response to virus                                                        | NS     | 0.0300 | 0.0205 |
| GO:1901184 | BP | regulation of ERBB signaling pathway                                              | 0.0404 | NS     | NS     |
| GO:1901185 | BP | negative regulation of ERBB signaling pathway                                     | 0.0258 | NS     | NS     |
| GO:1902284 | BP | neuron projection extension involved in neuron projection guidance                | NS     | 0.0353 | NS     |
| GO:2000107 | BP | negative regulation of leukocyte apoptotic process                                | NS     | NS     | 0.0334 |
| GO:2000108 | BP | positive regulation of leukocyte apoptotic process                                | NS     | NS     | 0.0242 |
| GO:2000514 | BP | regulation of CD4-positive, alpha-beta T cell activation                          | NS     | NS     | 0.0334 |
| GO:2001241 | BP | positive regulation of extrinsic apoptotic signaling pathway in absence of ligand | NS     | NS     | 0.0205 |
| GO:0000313 | CC | organellar ribosome                                                               | NS     | 0.0367 | NS     |
| GO:0005576 | CC | extracellular region                                                              | 0.0390 | NS     | NS     |
| GO:0005761 | CC | mitochondrial ribosome                                                            | NS     | 0.0367 | NS     |
| GO:0005776 | CC | autophagic vacuole                                                                | NS     | 0.0439 | NS     |
| GO:0005791 | CC | rough endoplasmic reticulum                                                       | 0.0280 | NS     | NS     |
| GO:0005814 | CC | centriole                                                                         | 0.0350 | NS     | NS     |
| GO:0005868 | CC | cytoplasmic dynein complex                                                        | NS     | NS     | 0.0260 |
| GO:0005874 | CC | microtubule                                                                       | 0.0170 | NS     | NS     |
| GO:0005905 | CC | coated pit                                                                        | 0.0370 | NS     | NS     |

|            |    |                                                                                                                               |        |        |        |
|------------|----|-------------------------------------------------------------------------------------------------------------------------------|--------|--------|--------|
| GO:0008023 | CC | transcription elongation factor complex                                                                                       | NS     | 0.0463 | NS     |
| GO:0030016 | CC | myofibril                                                                                                                     | NS     | 0.0212 | NS     |
| GO:0030017 | CC | sarcomere                                                                                                                     | NS     | 0.0147 | NS     |
| GO:0030018 | CC | Z disc                                                                                                                        | NS     | 0.0052 | NS     |
| GO:0030118 | CC | clathrin coat                                                                                                                 | 0.0310 | NS     | NS     |
| GO:0030119 | CC | AP-type membrane coat adaptor complex                                                                                         | 0.0270 | NS     | NS     |
| GO:0030120 | CC | vesicle coat                                                                                                                  | 0.0290 | NS     | NS     |
| GO:0030125 | CC | clathrin vesicle coat                                                                                                         | 0.0120 | NS     | NS     |
| GO:0030131 | CC | clathrin adaptor complex                                                                                                      | 0.0230 | NS     | NS     |
| GO:0030286 | CC | dynein complex                                                                                                                | NS     | NS     | 0.0350 |
| GO:0030669 | CC | clathrin-coated endocytic vesicle membrane                                                                                    | 0.0100 | NS     | NS     |
| GO:0031674 | CC | I band                                                                                                                        | NS     | 0.0075 | NS     |
| GO:0031941 | CC | filamentous actin                                                                                                             | NS     | 0.0343 | NS     |
| GO:0043034 | CC | costamere                                                                                                                     | NS     | 0.0295 | NS     |
| GO:0043198 | CC | dendritic shaft                                                                                                               | NS     | 0.0463 | NS     |
| GO:0043292 | CC | contractile fiber                                                                                                             | NS     | 0.0234 | NS     |
| GO:0044447 | CC | axoneme part                                                                                                                  | NS     | NS     | 0.0280 |
| GO:0044449 | CC | contractile fiber part                                                                                                        | NS     | 0.0178 | NS     |
| GO:0045334 | CC | clathrin-coated endocytic vesicle                                                                                             | 0.0130 | NS     | NS     |
| GO:0000166 | MF | nucleotide binding                                                                                                            | NS     | NS     | 0.0340 |
| GO:0001871 | MF | pattern binding                                                                                                               | 0.0100 | NS     | 0.0210 |
| GO:0001882 | MF | nucleoside binding                                                                                                            | NS     | NS     | 0.0440 |
| GO:0001883 | MF | purine nucleoside binding                                                                                                     | NS     | NS     | 0.0430 |
| GO:0003690 | MF | double-stranded DNA binding                                                                                                   | NS     | 0.0166 | NS     |
| GO:0003725 | MF | double-stranded RNA binding                                                                                                   | 0.0288 | NS     | NS     |
| GO:0004672 | MF | protein kinase activity                                                                                                       | NS     | NS     | 0.0280 |
| GO:0005044 | MF | scavenger receptor activity                                                                                                   | 0.0223 | NS     | 0.0470 |
| GO:0005085 | MF | guanyl-nucleotide exchange factor activity                                                                                    | NS     | 0.0365 | NS     |
| GO:0005088 | MF | Ras guanyl-nucleotide exchange factor activity                                                                                | NS     | 0.0179 | NS     |
| GO:0005089 | MF | Rho guanyl-nucleotide exchange factor activity                                                                                | NS     | 0.0069 | NS     |
| GO:0005200 | MF | structural constituent of cytoskeleton                                                                                        | 0.0353 | NS     | NS     |
| GO:0005319 | MF | lipid transporter activity                                                                                                    | 0.0320 | NS     | NS     |
| GO:0005342 | MF | organic acid transmembrane transporter activity                                                                               | 0.0489 | NS     | NS     |
| GO:0005343 | MF | organic acid:sodium symporter activity                                                                                        | 0.0182 | NS     | NS     |
| GO:0005524 | MF | ATP binding                                                                                                                   | NS     | NS     | 0.0200 |
| GO:0008028 | MF | monocarboxylic acid transmembrane transporter activity                                                                        | 0.0157 | NS     | NS     |
| GO:0008565 | MF | protein transporter activity                                                                                                  | 0.0417 | NS     | NS     |
| GO:0015294 | MF | solute:cation symporter activity                                                                                              | 0.0409 | NS     | NS     |
| GO:0015296 | MF | anion:cation symporter activity                                                                                               | 0.0239 | NS     | NS     |
| GO:0015370 | MF | solute:sodium symporter activity                                                                                              | 0.0296 | NS     | NS     |
| GO:0016701 | MF | oxidoreductase activity, acting on single donors with incorporation of molecular oxygen                                       | NS     | 0.0336 | NS     |
| GO:0016702 | MF | oxidoreductase activity, acting on single donors with incorporation of molecular oxygen, incorporation of two atoms of oxygen | NS     | 0.0259 | NS     |

|            |    |                                                        |        |        |        |
|------------|----|--------------------------------------------------------|--------|--------|--------|
| GO:0016773 | MF | phosphotransferase activity, alcohol group as acceptor | NS     | NS     | 0.0470 |
| GO:0016805 | MF | dipeptidase activity                                   | NS     | 0.0285 | NS     |
| GO:0017076 | MF | purine nucleotide binding                              | NS     | NS     | 0.0470 |
| GO:0030247 | MF | polysaccharide binding                                 | 0.0100 | NS     | 0.0210 |
| GO:0030506 | MF | ankyrin binding                                        | NS     | 0.0336 | NS     |
| GO:0030545 | MF | receptor regulator activity                            | 0.0215 | NS     | NS     |
| GO:0030554 | MF | adenyl nucleotide binding                              | NS     | NS     | 0.0230 |
| GO:0032266 | MF | phosphatidylinositol-3-phosphate binding               | NS     | 0.0336 | NS     |
| GO:0032549 | MF | ribonucleoside binding                                 | NS     | NS     | 0.0430 |
| GO:0032550 | MF | purine ribonucleoside binding                          | NS     | NS     | 0.0430 |
| GO:0032553 | MF | ribonucleotide binding                                 | NS     | NS     | 0.0470 |
| GO:0032555 | MF | purine ribonucleotide binding                          | NS     | NS     | 0.0460 |
| GO:0032559 | MF | adenyl ribonucleotide binding                          | NS     | NS     | 0.0220 |
| GO:0035639 | MF | purine ribonucleoside triphosphate binding             | NS     | NS     | 0.0420 |
| GO:0038024 | MF | cargo receptor activity                                | 0.0004 | NS     | NS     |
| GO:0042287 | MF | MHC protein binding                                    | 0.0083 | NS     | NS     |
| GO:0043167 | MF | ion binding                                            | NS     | NS     | 0.0330 |
| GO:0043566 | MF | structure-specific DNA binding                         | NS     | 0.0412 | NS     |
| GO:0046943 | MF | carboxylic acid transmembrane transporter activity     | 0.0481 | NS     | NS     |
| GO:0050750 | MF | low-density lipoprotein particle receptor binding      | 0.0083 | NS     | NS     |
| GO:0051082 | MF | unfolded protein binding                               | 0.0010 | NS     | NS     |
| GO:0070325 | MF | lipoprotein particle receptor binding                  | 0.0108 | NS     | NS     |
| GO:1901265 | MF | nucleoside phosphate binding                           | NS     | NS     | 0.0340 |
